# 1        **Perceptions and predictors of COVID-19 vaccine hesitancy among** 2        **health care providers across five countries in sub-Saharan Africa**

3  
4 Isabel Madzorera<sup>1¶\*</sup>, Livesy Naafoe Abokyi<sup>2,16 ¶</sup>, Edward Apraku<sup>2</sup>, Temesgen Azemraw<sup>3</sup>, Valentin Boudo<sup>4</sup>,  
5 Christabel James<sup>5</sup>, Dongqing Wang<sup>1</sup>, Frank Mapendo<sup>6</sup>, Ouhiré Millogo<sup>4</sup>, Nega Assefa<sup>3</sup>, Angela Chukwu<sup>7</sup>,  
6 Firehiwot Workneh<sup>8</sup>, Bruno Lankoande<sup>9</sup>, Elena C. Hemler<sup>1</sup>, Abbas Ismail<sup>10</sup>, Sulemana Abubakari<sup>2</sup>, Kwaku  
7 Poku Asante<sup>2</sup>, Yemane Berhane<sup>8</sup>, Japhet Killewo<sup>6</sup>, Ayoade Oduola<sup>5</sup>, Ali Sie<sup>4</sup>, Abdramane Soura<sup>9</sup>, Mary  
8 Mwanyika-Sando<sup>6</sup>, Said Vuai<sup>10</sup>, Emily Smith<sup>11</sup>, Till Baernighausen<sup>12</sup>, Raji Tajudeen<sup>13</sup>, Wafaie W Fawzi<sup>1,14,15\*</sup>

9  
10 <sup>1</sup>Department of Global Health and Population, Harvard T.H. Chan School of Public Health, Harvard  
11 University, Boston, Massachusetts, United States of America

12 <sup>2</sup> Kintampo Health Research Center, Research and Development Division, Ghana Health Service,  
13 Kintampo North Municipality, Bono East Region, Ghana

14 <sup>3</sup>College of Health and Medical Sciences, Haramaya University, Harar, Ethiopia

15 <sup>4</sup>Nouna Health Research Center, Burkina Faso

16 <sup>5</sup>University of Ibadan Research Foundation, Ibadan, Ibadan, Nigeria

17 <sup>6</sup>Africa Academy for Public Health, Dar es Salaam, Tanzania

18 <sup>7</sup>Department of Statistics, University of Ibadan, Ibadan, Nigeria

19 <sup>8</sup>Addis Continental Institute of Public Health, Ethiopia

20 <sup>9</sup>Institut Supérieur des Sciences de la Population, University of Ouagadougou, Ouagadougou, Burkina  
21 Faso

22 <sup>10</sup>College of Natural and Mathematical Sciences, University of Dodoma, Dodoma, Tanzania

23 <sup>11</sup>Department of Global Health, Milken Institute School of Public Health, George Washington University,

24 Washington, DC, United States of America

25 <sup>12</sup>Heidelberg Institute of Global Health, University of Heidelberg, Heidelberg, Germany

26 <sup>13</sup>Division of Public Health Institutes and Research, Africa Centres for Disease Control and Prevention,

27 Addis Ababa, Ethiopia

28 <sup>14</sup>Department of Nutrition, Harvard T.H. Chan School of Public Health, Harvard University, Boston,

29 Massachusetts, United States of America

30 <sup>15</sup>Department of Epidemiology, Harvard T.H. Chan School of Public Health, Harvard University, Boston,

31 Massachusetts, United States of America

32 <sup>16</sup>Department of Health Services, Policy, Planning, Management and Economics, School of Public Health,

33 University for Development Studies, Tamale, Ghana

34

35 <sup>¶</sup>These authors contributed equally to this work as first authors.

36 [ism313@mail.harvard.edu](mailto:ism313@mail.harvard.edu) (IM); [livesy.naafoe@uds.edu.gh](mailto:livesy.naafoe@uds.edu.gh) (LNA)

37

38 **\*Corresponding authors:**

39 [ism313@mail.harvard.edu](mailto:ism313@mail.harvard.edu) (IM); [mina@hsph.harvard.edu](mailto:mina@hsph.harvard.edu) (WF)

40

41

42 **Short title: COVID-19 vaccine hesitancy among health care providers in Africa**

43 **Conflict of Interest and Funding Disclosure:** No conflicts of interest are reported for all authors

44 **Funding Source:** This work was supported by institutional support from Harvard T.H. Chan School of

45 Public Health, Boston, MA; Harvard University Center for African Studies, Boston, MA; Heidelberg

46 Institute of Global Health, Germany and the George Washington University Milken Institute of Public

47 Health, Washington, DC.

48 **Key words:** COVID-19; vaccine hesitancy; health care providers; health workers; Sub-Saharan Africa

49

50 **Data sharing:** Individual participant data collected for this study may be shared based on a reasonable

51 request to the corresponding authors.

## 52 **Abbreviations**

|          |                                                                |
|----------|----------------------------------------------------------------|
| ARISE    | African Research, Implementation Science and Education network |
| COVID-19 | Coronavirus disease 2019                                       |
| HCP      | Health Care Providers                                          |
| PPE      | personal protective equipment                                  |
| SSA      | sub-Saharan Africa                                             |

53

54

55

56

57

58

59

60

61

62

63

64

65

66

67

68

69

70

71  
72  
73  
74  
75  
76  
77  
78  
79  
80  
81  
82  
83  
84  
85  
86  
87  
88  
89  
90  
91  
92  
93  
94

## Abstract

The African continent has some of the world’s lowest COVID-19 vaccination rates. While the limited availability of vaccines is a contributing factor, COVID-19 vaccine hesitancy among health care providers (HCP) is another factor that could adversely affect efforts to control infections on the continent. We sought to understand the extent of COVID-19 vaccine hesitancy among HCP, and its contributing factors in Africa. We evaluated COVID-19 vaccine hesitancy among 1,499 HCP enrolled in a repeated cross-sectional telephone survey in Burkina Faso, Ethiopia, Nigeria, Tanzania and Ghana. We defined COVID-19 vaccine hesitancy among HCP as self-reported responses of definitely not, maybe, unsure, or undecided on whether to get the COVID-19 vaccine, compared to definitely getting the vaccine. We used Poisson regression models to evaluate factors influencing vaccine hesitancy among HCP. Approximately 65.6% were nurses and the mean age ( $\pm$ SD) of participants was 35.8 ( $\pm$ 9.7) years. At least 67% of the HCP reported being vaccinated. Reasons for low COVID-19 vaccine uptake included concern about vaccine effectiveness, side effects and fear of receiving unsafe and experimental vaccines. COVID-19 vaccine hesitancy affected 45.7% of the HCP in Burkina Faso, 25.7% in Tanzania, 9.8% in Ethiopia, 9% in Ghana and 8.1% in Nigeria. Respondents reporting that COVID-19 vaccines are very effective (RR:0.21, 95% CI:0.08, 0.55), and older HCP (45 or older vs.20-29 years, RR:0.65, 95% CI: 0.44,0.95) were less likely to be vaccine-hesitant. Nurses were more likely to be vaccine-hesitant (RR 1.38, 95% CI: 1.00,1.89) compared to doctors. We found higher vaccine hesitancy among HCP in Burkina Faso and Tanzania. Information asymmetry among HCP, beliefs about vaccine effectiveness and the endorsement of vaccines by the public health institutions may be important. Efforts to address hesitancy should address information and knowledge gaps among different cadres of HCP and should be coupled with efforts to increase vaccine supply.

**Word count: 300**

95  
96  
97  
98  
99  
100  
101  
102  
103  
104  
105  
106  
107  
108  
109  
110  
111  
112  
113  
114  
115  
116  
117  
118

## INTRODUCTION

The Coronavirus disease 2019 (COVID-19) caused by the novel SARS-CoV-2 continues to be a major public health challenge on the African continent and globally. As of March 8, 2022, there were at least 433 million cases of COVID-19 worldwide, and over 5.9 million associated deaths (1). On the African continent, close to 8.4 million cases and 170,300 deaths had been recorded, accounting for 3% of all global COVID-19 related mortality in the same period (1). COVID-19 however could continue to pose a threat to communities in sub-Saharan Africa (SSA) in the future, largely due to the lower availability of vaccines and hesitancy to accept vaccines by some in the population (2).

While other regions have made significant investments in vaccine rollout to curtail the further spread of COVID-19, efforts on the African continent continue to be affected by global inequity in access to vaccines (3). By the end of December 2021, only 7 African countries had achieved the target of vaccinating 40% of their population (4). While at least 68% of the global population has received at least one dose of the COVID-19 vaccine, Africa has the lowest share of the global vaccinated population with approximately 22% of the population having been fully vaccinated, and less than 1% have received a booster dose against COVID-19 (5, 6). Among African countries, coverage of at least one dose of vaccine ranged from 86% in Seychelles, 80% in Mauritius, 80% in Rwanda, 70% in Comoros and 69% in Botswana, to less than 6% in Cameroon, Madagascar, Burundi and Democratic Republic of Congo (5, 6). The potential undeterred spread of the COVID-19 pandemic and potential future mutations has serious ramifications for a continent already dealing with significant health and economic challenges, including food insecurity, high food prices, inadequate diets, and slowed economic growth (7, 8).

COVID-19 vaccine hesitancy is a global threat to achieving herd immunity (9). On the African continent, only 1 in 4 health workers is fully vaccinated against COVID-19 (10). The low levels of vaccination among health workers in Africa may be due to the lower availability of COVID-19 vaccines but also partly influenced by a hesitancy to take the vaccine. COVID-19 vaccine hesitancy among health care

119 providers could be a serious threat to efforts to combat the pandemic in Africa as health workers play an  
120 essential role in the management and control of COVID-19 and have a high risk of getting infected. They  
121 are also a source of information on COVID-19 for the public and exert influence on public opinion in their  
122 contexts. COVID-19 vaccine hesitancy among healthcare workers could contribute to hesitancy in the  
123 general public and increase patient risk of contracting COVID-19.

124         Vaccine hesitancy, defined as the delay or reluctance of people or communities to receive safe  
125 and recommended vaccines, predates the COVID-19 pandemic (11, 12). Early studies in some SSA  
126 countries indicated a high willingness to take COVID-19 vaccines, however, this was before the availability  
127 of the vaccines (11, 13). A few studies have assessed hesitancy in COVID-19 vaccine uptake among health  
128 workers in Africa (9, 14, 15). A systematic review found COVID-19 acceptance rates of 46% across Africa  
129 and elevated levels of vaccine hesitancy have been reported (16, 17). However, acceptance rates as low  
130 as 28% have been reported in Central Africa (16). Factors influencing attitudes towards COVID-19 vaccines  
131 include fears about vaccine safety given the rapid development of vaccines, serious side effects, efficacy,  
132 lack of information and distrust of science and religious reasons (16). Gaps remain in our understanding  
133 of the extent of vaccine hesitancy among HCP in various contexts in SSA and the factors associated with  
134 it. This study contributes to understanding these gaps.

135         Understanding vaccine hesitancy and its predictors among HCP is important to inform strategies  
136 to enhance vaccination rates on the African continent (11). This study aimed to assess the magnitude and  
137 determinants of COVID-19 vaccine hesitancy among HCP across five countries in SSA that are part of the  
138 Africa Research Implementation Science and Education (ARISE) Network, Burkina Faso, Ethiopia, Nigeria,  
139 Tanzania and Ghana.

140  
141  
142  
143  
144  
145  
146  
147  
148  
149  
150  
151  
152  
153  
154  
155  
156  
157  
158  
159  
160  
161  
162  
163

## MATERIAL AND METHODS

### Study setting

The study was part of a repeated cross-sectional survey conducted to assess knowledge and practices related to COVID-19 prevention and vaccination, and to evaluate the impact of COVID-19 on nutrition, health and other domains among adolescents, adults and HCP in 5 countries included in the ARISE Network. The ARISE network is a platform for public health research and training and includes 21 member institutions across nine sub-Saharan African countries.

Study participants for this study were HCP currently employed in health centres in the study areas. Briefly, in the baseline survey, we collected data from HCPs in urban areas of 3 SSA countries, Burkina Faso (Ouagadougou), Ethiopia (Addis Ababa), and Nigeria (Lagos). In round 2 of the survey, data were collected from these sites and additionally in rural Ghana (Kintampo) and urban Tanzania (Dar es Salaam). Further information on the ARISE sites in Burkina Faso, Ethiopia and Nigeria and their characteristics are described elsewhere (18, 19). Information on the design of the round 2 survey is described on Harvard University Center for African Studies website ([https://africa.harvard.edu/files/african-studies/files/arise\\_covid\\_survey\\_round\\_2\\_methods\\_brief\\_final.pdf](https://africa.harvard.edu/files/african-studies/files/arise_covid_survey_round_2_methods_brief_final.pdf)).

In the new round 2 sites of Tanzania and Kintampo, the study obtained HCP lists from medical professional associations and healthcare facilities in urban Dares Salaam and rural Kintampo. In all sites, the inclusion criteria were HCPs currently working in a healthcare setting, inclusive of all types of health facilities where COVID-19-related services were provided. We excluded dentists, pharmacists and other health providers in specialties unlikely to deliver COVID-19 related medical services. Fig 1 shows the sites included in the study.

**Figure 1: Map of ARISE sites for Round 2 of the COVID-19 studies**



164 **Study design**

165 This study utilized computer-assisted telephone interviews to collect data from HCP currently employed  
166 in government, public and private health facilities in the study sites. Sampling frames for the study were  
167 developed using databases of HCP and their telephone numbers provided by professional associations  
168 and health facilities in each country. The study sites randomly selected 500 HCP to interview from the  
169 provided sampling lists in each country in Round 1, with a target to recruit 300 HCP. The target sample  
170 size for the round 2 survey was 300 HCP from each of the sites in the study. In round 2, participants from  
171 round 1; in Ethiopia, Burkina Faso and Nigeria, who were available were first interviewed. New  
172 participants were then randomly recruited from existing sampling frames to replace unavailable  
173 participants in round 1 to meet study sample size requirements.

174 Study data were collected by trained research assistants using standardized survey questionnaires  
175 that were adopted to the sites. Research assistants collected data on socio-demographic characteristics,  
176 including age, sex, occupation of the HCP, their knowledge, attitudes, practices and perceptions of COVID-  
177 19, as well as vaccine-related beliefs and hesitancy. Data collection was conducted between July to  
178 December of 2021. Round 1 survey data collection was conducted from July to November of 2020. Of the  
179 900 HCPs interviewed in round 1, there were 548 participants retained in round 2 of the survey indicating  
180 a retention rate of 61%.

181

182 **Outcome: Vaccine hesitancy**

183 We asked respondents if a COVID-19 vaccine were available, would they get it. We defined COVID-  
184 19 vaccine hesitancy among unvaccinated HCPs as responses of definitely not getting the vaccine, maybe,  
185 unsure, or undecided on whether to get the COVID-19 vaccine were it available, compared to responses  
186 of definitely getting the vaccine. If the HCP was already vaccinated, they were classified as not vaccine-

187 hesitant. Based on these survey responses, we created a binary variable for COVID-19 vaccine hesitancy  
188 (Yes/No).

### 189 **Statistical analysis**

190 We used descriptive and inferential statistics for the analysis. Descriptive statistics used  
191 frequencies for categorical variables and means and standard deviations for continuous variables to  
192 summarize socio-demographic characteristics, perceptions around COVID-19 vaccines, workplace  
193 practices and key COVID-19 related practices in round 2 of the survey. We used generalized estimating  
194 equation (GEE) Poisson regression models to evaluate associations between sociodemographic and other  
195 characteristics with vaccine hesitancy among HCPs in Round 2 of the study.

196 We evaluated factors associated with vaccine hesitancy among HCP. We considered the following  
197 possible predictors of vaccine hesitancy: age (20-29, 30-39,  $\geq$  40 years); respondent sex (female/male);  
198 occupation (doctor, nurse, other), health facility (government facility, private hospital, health outpost or  
199 other), religion (Catholic or none Muslim, orthodox Christian, Protestant or other), self-perceived risk of  
200 COVID-19 exposure (no risk, low risk, very high risk, high risk), perceived effectiveness of COVID-19 vaccine  
201 (not effective at all, not very effective, somewhat effective, very effective), perceived safety of COVID-19  
202 vaccines (very safe, somewhat safe, neither safe nor unsafe, not very safe, not at all safe), COVID-19  
203 testing available in the facility where the HCP worked (Yes/No, free testing/paid testing). We also  
204 considered the type of COVID-19 testing available (Antigen test, PCR), having tested positive for COVID-  
205 19 previously (Yes/No), having cared for COVID-19 patients previously (never, yes and in the past one  
206 month, yes but over one month ago), workplace COVID-19 policies (Yes/No), influence of vaccine  
207 production in Africa on willingness to take vaccine (No, will not change my mind/Yes, will decrease my  
208 chances of taking it/Yes, will increase my chances of taking it), COVID 19 control practices (score indicating  
209 level of prevention measures being implemented in the workplace including wearing masks, using  
210 personal protective equipment (PPE), hand washing with water and soap, social distancing, sanitizers or

211 hand washing station in health facility, cleaning and decontamination or disinfection of public areas,  
212 checking high temperatures, Yes/No), believe COVID-19 vaccine is bioweapon (Yes/No) and World Health  
213 Organization (WHO)/UNICEF endorsement of COVID-19 vaccine as safe and effective affect likelihood get  
214 the vaccine (much more likely, more likely, no difference, less likely and much less likely)

215 Further, we also considered a score of reasons for not getting the COVID-19 vaccine (Do not think  
216 it is needed, not at risk of getting COVID, vaccine not effective against COVID-19, negative media reports,  
217 vaccine not safe/ developed too fast, concerned about side effects, fear of experimental vaccine, will get  
218 worse quality vaccines, fear getting COVID-19 disease from the vaccine, illnesses/autism from the vaccine,  
219 will cause infertility/sterilization/population control, religious reasons/church, microchipping fears, New  
220 World Order, bad reaction with previous vaccinations, chronic condition e.g. diabetes, hypertension and  
221 personal liberty/do not want bodily intrusion.

222 Covariates were selected for inclusion in the main model using univariate tests at  $p < 0.20$ . We  
223 evaluated for significant associations in the adjusted models based on a significance level of  $p < 0.05$ . We  
224 used the missing indicator approach to account for missing covariate data. Analysis was conducted using  
225 SAS 9.4 (Cary, NC, USA).

226

## 227 **Ethical approval and consent**

228 Verbal consent was obtained from study participants before they were admitted into the study.  
229 Ethical approval for the study was obtained from the Institutional Review Board at Harvard T.H. Chan  
230 School of Public Health and ethical review boards in each country and site, including the Kintampo Health  
231 Research Centre Institutional Ethics Committee in Ghana; the Nouna Health Research Center Ethical  
232 Committee and National Ethics Committee in Burkina Faso; the Institutional Ethical Review Board of Addis  
233 Continental Institute of Public Health in Ethiopia; the University of Ibadan Research Ethics Committee and

234 National Health Research Ethics Committee in Nigeria; and the Muhimbili University of Health and Allied  
235 Sciences and National Institute for Medical Research in Tanzania.

236

237

238

239

240

241

242

243

244

245

246

247

248

249

250

251

252

253

254

255

256

257

258  
259  
260  
261  
262  
263  
264  
265  
266  
267  
268  
269  
270  
271  
272

## RESULTS

There were 1499 HCP included in the study across the 5 SSA countries. Of the participants, 300 were from Burkina Faso, 277 were from Ethiopia, 312 were from Nigeria, 310 were from Tanzania and 300 were from Ghana. Table 1 shows the socio-demographic characteristics of the study population. The majority of respondents (59.8%) across all countries were female. In Burkina Faso, however, female participants were fewer (46%) compared to men. The mean age ( $\pm$ SD) of respondents was 35.8 ( $\pm$ 9.7) years. Most HCP in Ghana and Ethiopia were under 30 years of age, while in all other countries most respondents were in the 30-44 years age group. The majority of HCP assessed across all the countries were nurses (65.6%), with Ghana and Burkina Faso accounting for the highest proportion of nurses with 89.7% and 65.7% respectively. The majority of respondents worked in government hospitals or clinics. In Tanzania, 41.3% of HCPs worked in health posts where primary health care services were provided, while 24.3% from Ghana worked in Mission hospitals. In Ethiopia and Nigeria, most of the respondents reported Orthodox Christian religion. In Burkina Faso 49.8% were Catholic, and in Ghana and Tanzania at least 48% were Protestant or from other Christian denominations.

273 **Table 1: Socio-demographic characteristics of HCP across 5 countries in sub-Saharan Africa**

| Characteristics                         | Burkina Faso   | Ethiopia       | Nigeria         | Tanzania       | Ghana          | Total          |
|-----------------------------------------|----------------|----------------|-----------------|----------------|----------------|----------------|
| <b>N</b>                                | <b>300</b>     | <b>277</b>     | <b>312</b>      | <b>310</b>     | <b>300</b>     | <b>1499</b>    |
| <b>Female sex</b>                       | 138 (46.0)     | 164 (59.2)     | 217 (69.6)      | 214 (69.0)     | 164 (54.7)     | 897 (59.8)     |
| <b>Age of respondent in years</b>       |                |                |                 |                |                |                |
| 20-29                                   | 28(9.3)        | 119(43.0)      | 76(24.4)        | 113(36.5)      | 155(51.7)      | 491(32.8)      |
| 30-44                                   | 183(61.0)      | 115(41.5)      | 125(40.1)       | 150(48.4)      | 139(46.3)      | 712(47.5)      |
| $\geq$ 45                               | 89(29.7)       | 43(15.5)       | 111(35.6)       | 47(15.2)       | 6(2.0)         | 296(19.8)      |
| Age of respondent (Mean $\pm$ SD) years | 39.9 $\pm$ 9.1 | 33.7 $\pm$ 9.7 | 39.7 $\pm$ 11.7 | 34.6 $\pm$ 8.6 | 30.8 $\pm$ 4.7 | 35.8 $\pm$ 9.7 |
| <b>Health care provider</b>             |                |                |                 |                |                |                |
| Doctor                                  | 85 (28.3)      | 118 (42.6)     | 99 (31.7)       | 105 (33.9)     | 3 (1.0)        | 410 (27.4)     |
| Nurse                                   | 197 (65.7)     | 157 (56.7)     | 182 (58.3)      | 179 (57.7)     | 269 (89.7)     | 984 (65.6)     |
| Clinical officer                        | 2 (0.7)        | 2 (0.7)        | 9 (2.9)         | 25 (8.1)       | 6 (2.0)        | 44 (2.9)       |
| Community health worker                 | 8 (2.7)        | 0(0)           | 13 (4.2)        | 0(0)           | 6 (2.0)        | 27 (1.8)       |

|                                                        |            |            |            |            |            |            |
|--------------------------------------------------------|------------|------------|------------|------------|------------|------------|
| Medical Assistant or other                             | 8 (2.7)    | 0(0)       | 9(2.9)     | 1 (0.3)    | 16 (5.3)   | 34 (2.3)   |
| <b>Health facility type</b>                            |            |            |            |            |            |            |
| Government hospital/clinic                             | 208 (69.3) | 207 (74.7) | 224 (71.8) | 182 (58.7) | 169 (56.3) | 990 (66.0) |
| Private hospital /clinic                               | 87 (29.0)  | 51 (18.4)  | 80 (25.6)  | 0(0)       | 12 (4.0)   | 230(15.3)  |
| Health outpost/CHPS compound)                          | 1 (0.3)    | 16 (5.8)   | 5 (1.6)    | 128 (41.3) | 46 (15.3)  | 196 (13.1) |
| Mission hospital                                       | 4 (1.3)    | 3 (1.1)    | 3 (1.0)    | 0(0)       | 73 (24.3)  | 83 (5.5)   |
| <b>Religion</b>                                        |            |            |            |            |            |            |
| None                                                   | 1 (0.3)    | 2 (0.7)    | 4 (1.3)    | 1 (0.3)    | 0 (0)      | 8 (0.5)    |
| Catholic                                               | 149 (49.8) | 3 (1.1)    | 23 (7.4)   | 79 (25.6)  | 70 (23.3)  | 324 (21.7) |
| Muslim                                                 | 106 (35.5) | 21 (7.6)   | 41 (13.3)  | 78 (25.2)  | 40 (13.3)  | 286 (19.1) |
| Orthodox Christian                                     | 3 (1.0)    | 198 (71.5) | 141 (45.6) | 1 (0.3)    | 37 (12.3)  | 380 (25.4) |
| Protestant and other Christian                         | 40 (13.4)  | 53 (19.1)  | 100(32.4)  | 150 (48.5) | 153 (51.0) | 496 (33.2) |
| <b>COVID-19 testing and patient care in facilities</b> |            |            |            |            |            |            |
| Ever tested for COVID-19                               | 142 (47.7) | 215 (77.6) | 168 (53.9) | 128 (42.7) | 42 (13.6)  | 695(46.4)  |
| Ever tested positive for COVID-19                      | 14(9.8)    | 68(31.5)   | 39(23.2)   | 13(33.3)   | 26(21.7)   | 160(23.3)  |
| <b>Ever cared for COVID-19 patients</b>                |            |            |            |            |            |            |
| Never                                                  | 197(66.1)  | 44(15.9)   | 164(53.3)  | 158(52.0)  | 194(70.3)  | 757(51.8)  |
| Yes, in the past one month                             | 13(4.4)    | 124(44.9)  | 51(16.6)   | 7(2.3)     | 32(11.6)   | 227(15.5)  |
| Yes, over one month ago                                | 88(29.5)   | 108(39.1)  | 93(30.2)   | 139(45.7)  | 50(18.1)   | 478(32.7)  |

274 Data shown as mean  $\pm$ SD or N (percent). Acronyms: CHPS Community Health Planning and Services

275

276 Testing services were available for 85% of the respondents in Ethiopia, 67% in Nigeria, 59% in

277 Burkina Faso, 40% in Ghana and 38% in Tanzania (results not shown). Among those facilities that had

278 COVID testing services, most of the services were free. COVID-19 testing was free for the majority of

279 respondents in Burkina Faso (98%), Ethiopia (90%), Nigeria (81%) and Ghana (98%). COVID-19 testing was

280 paid for 60% in Tanzania and 19% in Nigeria, and less than 10% of the time in the other countries.

281 Availability of PCR and antigen testing for COVID-19 was comparable, with respondents reporting 28.6%

282 availability for the former compared to 25.4% for the latter. Of those HCP who had ever tested for COVID-

283 19, about 23.3% had tested positive (Table 1). Approximately 52% of HCP in the study had never cared

284 for a COVID-19 patient, and 15.5% had cared for patients affected in the previous month before the

285 survey.

286 Table 2 shows HCP prevention measures implemented in the workplace and beliefs around  
 287 COVID-19. The measures that most HCPs reported as being implemented in the workplace were wearing  
 288 a mask (97.4%), handwashing with water and soap (97.6%), and regular cleaning or decontamination of  
 289 public areas (92.0%). The least commonly practiced measures were wearing PPE (73.3%) and socially  
 290 distancing patients in waiting rooms (69.9%). The use of personal protective equipment (PPE) was least  
 291 reported in Ghana (55.2%) and Tanzania (62.3%). In Burkina Faso, socially distancing patients was reported  
 292 by only 44.4% of HCP, and by 65.7% in Tanzania. In Ethiopia, temperature checks were reported by only  
 293 55.6% and in Tanzania by 67.1%.

294

295 **Table 2: Frequency of COVID-19 preventive practices and beliefs about vaccines among HCP across 5**  
 296 **countries in sub-Saharan Africa**

| COVID-19 preventive practices and beliefs about vaccines                                                | Burkina Faso | Ethiopia  | Nigeria   | Tanzania  | Ghana     | Total      |
|---------------------------------------------------------------------------------------------------------|--------------|-----------|-----------|-----------|-----------|------------|
| <b>COVID-19 Prevention practices</b>                                                                    |              |           |           |           |           |            |
| Wearing masks                                                                                           | 295(98.3)    | 275(99.3) | 311(100)  | 279(90.3) | 298(99.3) | 1458(97.4) |
| Using personal protective equipment (PPE) such as gowns, goggles, shields, etc.                         | 274(91.6)    | 231(83.7) | 231(74.8) | 192(62.3) | 165(55.2) | 1093(73.3) |
| Hand washing with water and soap                                                                        | 296(98.7)    | 258(93.1) | 309(99.4) | 299(96.5) | 300(100)  | 1462(97.6) |
| Keeping sufficient distance between patients in the waiting area                                        | 131(44.4)    | 183(66.3) | 280(90.3) | 203(65.7) | 243(81.5) | 1040(69.9) |
| Presence of sanitizers or hand washing station in all service delivery points                           | 268(89.9)    | 208(75.6) | 301(97.1) | 303(97.7) | 293(98.0) | 1373(92.0) |
| Regular cleaning and decontamination/disinfection of public areas and offices                           | 268(89.3)    | 220(80.3) | 286(93.2) | 241(77.7) | 292(97.3) | 1307(87.7) |
| Temperature measurement (high temperatures 37 degrees Celsius)                                          | 257(86.0)    | 154(55.6) | 279(89.7) | 208(67.1) | 288(96.0) | 1186(79.2) |
| <b>Beliefs about COVID-19 vaccines</b>                                                                  |              |           |           |           |           |            |
| Vaccine trial participants have died after taking the vaccine                                           | 37(19.6)     | 51(22.4)  | 53(23.7)  | 20(9.5)   | 26(10.6)  | 187(17.1)  |
| Side effects from the COVID-19 vaccine are usually mild and temporary, and should go away in a few days | 253(94.4)    | 223(80.8) | 261(86.4) | 216(83.4) | 278(95.5) | 1231(88.2) |
| There is no need for a vaccine because COVID-19 is a conspiracy or a bioweapon                          | 26(10.4)     | 16(6.1)   | 10(3.4)   | 8(2.9)    | 12(4.3)   | 72(5.3)    |

| COVID-19 preventive practices and beliefs about vaccines                                              | Burkina Faso | Ethiopia  | Nigeria   | Tanzania  | Ghana     | Total     |
|-------------------------------------------------------------------------------------------------------|--------------|-----------|-----------|-----------|-----------|-----------|
| People on the African continent are immune to COVID-19, so there is no need for a vaccine             | 13(4.9)      | 17(6.2)   | 5(1.7)    | 10(3.4)   | 12(4.1)   | 57(4.0)   |
| It is not necessary to get a COVID-19 vaccine if you follow all safety protocols                      | 56(19.7)     | 32(11.6)  | 16(5.3)   | 10(3.3)   | 23(7.8)   | 137(9.4)  |
| There is not enough evidence that the COVID-19 vaccine prevents the occurrence and spread of COVID-19 | 166(65.6)    | 89(32.7)  | 143(49.3) | 139(52.9) | 168(61.8) | 705(52.2) |
| The COVID-19 vaccine was developed too fast.                                                          | 240(87.3)    | 141(53.0) | 132(49.4) | 234(82.1) | 160(60.4) | 907(66.8) |

297 Data shown as N (percent)

298

299 In terms of knowledge about the COVID-19 vaccine, 88.2% of the HCP indicated that the side-  
300 effects of COVID-19 vaccine are usually mild. About 66.8% of the respondents across all 5 countries  
301 reported that the vaccine was developed too fast. Additionally, 52% of the HCPs in all sites did not believe  
302 there was sufficient evidence that the COVID-19 vaccine prevents the occurrence and spread of COVID-  
303 19, with more than 60% of HCP in Burkina Faso and Ghana reporting this. About 17% of HCP believe that  
304 people had died after taking the COVID-19 vaccine (more than 22% in Ethiopia and Nigeria). Across all  
305 countries, a few respondents (< 10%) believed that it is not necessary to get COVID 19 vaccine if one  
306 follows all COVID-19 safety protocols (20% in Burkina Faso and 12% in Ethiopia). Less than 11% of all  
307 respondents believed the COVID-19 is a conspiracy or a bioweapon and 4% reported that people on the  
308 African continent are immune to COVID-19.

309

310 **Figure 2a: Health care provider perceptions of risk of COVID-19 exposure in 5 countries in sub-Saharan**  
311 **Africa**

312

313 Almost all HCP from study countries perceived a high to very high risk of exposure to COVID-19  
314 except in Burkina Faso, where about 41% of HCP perceived a low risk of exposure (Fig 2a). At least 28% of  
315 all HCP believed that the COVID-19 vaccines were very safe and up to 45% thought they were somewhat



316 safe (Fig 2b). Only 1% of the HCP believed the COVID-19 vaccines were not safe at all. Approximately 8%  
317 believed they were not very safe, with the highest proportion with this belief in Ghana (21.0 %). The  
318 majority of respondents believed that COVID-19 vaccines were very or somewhat effective in preventing  
319 the disease. In Ethiopia 32% of respondents believed vaccines were not very effective (Fig 2c).

320

321 **Figure 2b: Health care provider perceptions on COVID-19 vaccine safety in 5 countries in sub-Saharan**  
322 **Africa**

323

324 **Figure 2c: Health care provider perceptions on COVID-19 vaccine effectiveness in 5 countries in sub-**  
325 **Saharan Africa**

326

327 Table 3 shows beliefs about the COVID-19 vaccine, and willingness to take vaccines. At least 85%  
328 of the respondents indicated that COVID-19 vaccines were available in their country and localities, except  
329 in Ghana, where 45.7% reported vaccine availability at the time of the interview. The majority of HCPs  
330 (84%) indicated that COVID-19 vaccine was available to them as HCPs, with 67.9% of them having been  
331 vaccinated by the time of the survey, and a further 10.8% expecting to be vaccinated by the end of 2021.  
332 Vaccination rates were lowest in Burkina Faso (40.3%), Tanzania (66.5%) and Ghana (69.3%). At least 86%  
333 of HCP indicated that it was important for HCPs to get vaccinated. At least 77% of HCPs reported that  
334 their workplaces had formulated policies on COVID-19. Most participants from Nigeria (95.2%), Ghana  
335 (87.7%) and Ethiopia (75.1%) reported having workplace guidelines on COVID-19 but only 60.1% and  
336 67.1% from Burkina Faso and Tanzania, respectively, had guidelines.

337

338

339

340 **Table 3: Perceptions of the safety, effectiveness and availability of vaccines and willingness to get the**  
 341 **COVID-19 vaccine and expected benefits in 5 countries in sub-Saharan Africa**

| Characteristics                                                                                                                 | Burkina Faso | Ethiopia   | Nigeria    | Tanzania   | Ghana       | Total       |
|---------------------------------------------------------------------------------------------------------------------------------|--------------|------------|------------|------------|-------------|-------------|
| <b>Perceived safety of vaccines</b>                                                                                             |              |            |            |            |             |             |
| In general, I believe that vaccines are safe                                                                                    | 153 (75.7)   | 210 (76.6) | 292 (99.0) | 250 (89.3) | 279 (95.6)  | 1183 (88.2) |
| <b>Vaccine hesitancy</b>                                                                                                        |              |            |            |            |             |             |
|                                                                                                                                 | 137(45.7)    | 27(9.8)    | 25(8.1)    | 79(25.7)   | 27(9.0)     | 295(19.7)   |
| <b>Availability of COVID-19 vaccines</b>                                                                                        |              |            |            |            |             |             |
| Covid 19 vaccine available in country                                                                                           | 298 (100)    | 237 (85.6) | 306 (98.1) | 306 (98.7) | 137 (45.7)  | 1284 (85.8) |
| Covid 19 vaccine has been made available to you as a healthcare provider                                                        | 192 (64.4)   | 258 (93.1) | 287 (92.0) | 299 (96.5) | 225 (75.0)  | 1261 (84.2) |
| <b>Have you or any of your colleagues received the Covid 19 vaccination</b>                                                     |              |            |            |            |             |             |
| Yes, I have been vaccinated                                                                                                     | 120 (40.0)   | 226 (81.6) | 257 (82.4) | 206 (66.5) | 208 (69.3)  | 1017 (67.9) |
| I know someone who has been vaccinated                                                                                          | 135 (45.0)   | 29 (10.5)  | 27 (8.7)   | 97 (31.3)  | 81 (27.0)   | 369 (24.6)  |
| <b>Workplace has formulated policies or guidelines related to COVID-19</b>                                                      |              |            |            |            |             |             |
| 179 (60.1)                                                                                                                      | 208 (75.1)   | 297 (95.2) | 269 (87.7) | 208 (67.1) | 1161 (77.6) |             |
| <b>How important is it for Health care providers to get vaccinated against COVID-19</b>                                         |              |            |            |            |             |             |
| Very important                                                                                                                  | 209 (70.4)   | 217 (78.3) | 291 (93.3) | 284 (91.6) | 288 (96.0)  | 1289 (86.2) |
| Somewhat important                                                                                                              | 69 (23.2)    | 49 (17.7)  | 15 (4.8)   | 19 (6.1)   | 10 (3.3)    | 162 (10.8)  |
| Not very important                                                                                                              | 11 (3.7)     | 4 (1.4)    | 2 (0.6)    | 3 (1.0)    | 0           | 20 (1.3)    |
| Not important at all                                                                                                            | 4 (1.4)      | 6 (2.2)    | 0          | 0          | 1 (0.3)     | 11 (0.7)    |
| Don't know                                                                                                                      | 4 (1.4)      | 0          | 4 (1.3)    | 4 (1.3)    | 1 (0.3)     | 13 (0.9)    |
| <b>COVID-19 vaccine's country of origin affects my willingness to take the vaccine</b>                                          |              |            |            |            |             |             |
| 74 (24.9)                                                                                                                       | 107 (38.6)   | 56 (18.0)  | 68 (21.9)  | 91 (30.3)  | 396 (26.5)  |             |
| <b>If COVID-19 vaccine had been developed or tested in Africa would that affect your willingness to take it or recommend it</b> |              |            |            |            |             |             |
| No, will not change my mind                                                                                                     | 88 (29.6)    | 191 (69.0) | 198 (63.5) | 205 (66.1) | 209 (69.7)  | 891 (59.6)  |
| Yes, will decrease my chances of taking it                                                                                      | 2 (0.7)      | 46 (16.6)  | 41 (13.1)  | 18 (5.8)   | 26 (8.7)    | 133 (8.9)   |
| Yes, will increase my chances of taking it                                                                                      | 199 (67.0)   | 32 (11.6)  | 56 (18.0)  | 68 (21.9)  | 60 (20.0)   | 415 (27.7)  |
| <b>When do you think a COVID-19 vaccine will be made available to you</b>                                                       |              |            |            |            |             |             |
| Never                                                                                                                           | 4 (1.4)      | 20 (7.2)   | 3 (1.0)    | 16 (5.2)   | 2 (0.7)     | 45 (3.0)    |
| Already received the vaccine                                                                                                    | 119 (40.1)   | 226 (81.6) | 257 (82.4) | 206 (66.5) | 208 (69.3)  | 1016 (67.9) |
| Before the end of 2021                                                                                                          | 88 (29.6)    | 15 (5.4)   | 21 (6.7)   | 12 (3.9)   | 26 (8.7)    | 162 (10.8)  |
| During the first six months of 2022                                                                                             | 7 (2.4)      | 9 (3.3)    | 3 (1.0)    | 7 (2.3)    | 9 (3.0)     | 35 (2.4)    |
| During the last six months of 2022                                                                                              | 2 (4.7)      | 1 (0.4)    | 3 (1.0)    | 4 (1.3)    | 2 (0.7)     | 12 (0.8)    |
| 2023 or later                                                                                                                   | 37 (12.5)    | 4 (1.5)    | 2 (0.6)    | 9 (2.9)    | 9 (3.0)     | 61 (4.1)    |
| Don't know                                                                                                                      | 39 (13.1)    | 2 (0.7)    | 21 (6.7)   | 50 (16.1)  | 44 (14.7)   | 156 (10.4)  |
| <b>Would you recommend that my friends and loved ones get the COVID-19 vaccine</b>                                              |              |            |            |            |             |             |
| 57 (19.2)                                                                                                                       | 26 (9.4)     | 11 (3.5)   | 33 (10.7)  | 6 (2.0)    | 133 (8.9)   |             |
| <b>Are you doing any activities to boost your community's confidence in taking the vaccine</b>                                  |              |            |            |            |             |             |
| Community outreach/education                                                                                                    | 214 (72.1)   | 228 (82.3) | 185 (59.3) | 261 (84.2) | 193 (64.3)  | 1081 (72.3) |
| Other                                                                                                                           | 0(0)         | 0(0)       | 23 (7.4)   | 0(0)       | 9 (3.0)     | 32 (2.2)    |

| Characteristics                                                 | Burkina Faso | Ethiopia   | Nigeria    | Tanzania  | Ghana      | Total      |
|-----------------------------------------------------------------|--------------|------------|------------|-----------|------------|------------|
| Willing to participate in a vaccine clinical trial if available | 181 (60.9)   | 136 (49.1) | 102 (32.7) | 69 (22.3) | 141 (47.0) | 629 (42.1) |

342

343           Approximately 26.5% of HCPs indicated that the origin of the vaccine influenced their willingness  
344 to take COVID-19 vaccines, and 27.7% of all respondents indicated that if a vaccine were developed and  
345 tested in Africa, this would increase their willingness to take it. This was more so in Burkina Faso, where  
346 67% of HCP indicated a greater willingness to take African vaccines. Among unvaccinated HCP, the  
347 majority indicated a willingness to take the vaccine if it was availed to them (Suppl Fig 1). However, in  
348 Tanzania, 48.1% of unvaccinated HCPs reported unwillingness and 18.3% were undecided on whether to  
349 take the COVID-19 vaccine. Reasons for unwillingness to take the COVID-19 vaccines across the countries  
350 include not thinking the vaccine was effective, concern about side effects, concern that vaccine  
351 development was too fast, fear of receiving poor quality vaccines and negative media reports. These  
352 concerns were most frequently reported in Burkina Faso (Fig 3). Finally, HCPs reported that the most  
353 prescribed treatments for COVID-19 were antibiotics/azithromycin (47.2%) and multivitamins (33.4%)  
354 (Supplementary Fig 2). Close to 20% of the cases were not prescribed any medications.

355

356 **Figure 3: Frequent reasons (%) for not getting COVID-19 vaccination in 5 countries in sub-**  
357 **Saharan Africa**

358

359           COVID-19 vaccine hesitancy affected 19.7% of the HCPs (Table 3). Reported hesitancy was highest  
360 in Burkina Faso (45.7%) and Tanzania (25.7%) compared to other countries. The lowest levels of vaccine  
361 hesitancy were reported in Nigeria at 8.1% and Ghana at 9.0%.

362 Table 4 shows factors associated with COVID-19 vaccine hesitancy among HCP in the study. We  
363 found that there were site-specific differences in the risk of COVID-19 vaccine hesitancy among HCP. In  
364 Ethiopia (RR:0.52, 95% CI: 0.29,0.95) HCP had lower vaccine hesitancy, and in Tanzania, there was a trend  
365 towards having higher vaccine hesitancy (RR:1.49, 95% CI: 0.99,2.25,  $p=0.06$ ) among HCP compared to  
366 Burkina Faso. Age was associated with vaccine hesitancy, with HCPs aged 45 years or older less likely to  
367 be vaccine-hesitant (RR:0.65, 95% CI: 0.44,0.95) compared to those aged 20-29 years. Nurses were more  
368 likely to be vaccine-hesitant (RR 1.38, 95% CI: 1.00,1.89) compared to doctors. Respondents reporting that  
369 COVID-19 vaccines are very effective (RR:0.21, 95% CI:0.08, 0.55) were less likely to report vaccine  
370 hesitancy. For each reason given by HCP for not wishing to receive COVID-19 vaccination, the risk of being  
371 vaccine-hesitant increased (RR 1.78, 95% CI:1.62, 1.95). Finally, HCP reporting that the World Health  
372 Organization or UNICEF endorsement of the COVID-19 vaccine as safe and effective would make them  
373 more likely (RR 0.51, 95% CI:0.35, 0.74) or much more likely (RR 0.69, 95% CI:0.52, 0.92) to receive the  
374 vaccine were less likely to be vaccine-hesitant.

375 **Table 4: Factors associated with COVID-19 vaccine hesitancy among health care providers in round 2 of the ARISE COVID study in 5 countries**

|                            | Unadjusted<br>RR (95% CI) | Adjusted<br>RR (95% CI) |
|----------------------------|---------------------------|-------------------------|
| <b>Country</b>             |                           |                         |
| Burkina Faso               | Ref                       | ref                     |
| Ethiopia                   | 0.21(0.14,0.32) ***       | 0.52(0.29,0.95)*        |
| Nigeria                    | 0.18(0.12,0.27) ***       | 0.67(0.37,1.23)         |
| Tanzania                   | 0.56(0.43,0.74) ***       | 1.49(0.99,2.25)         |
| Ghana                      | 0.56(0.43,0.74) ***       | 0.65(0.36,1.17)         |
| Male sex                   | 0.86(0.68,1.09)           | 0.90(0.69,1.18)         |
| <b>Age</b>                 |                           |                         |
| <30 years                  | Ref                       | ref                     |
| 30-44 years                | 1.19(0.92,1.54)           | 0.80(0.59,1.08)         |
| 45 years+                  | 0.97(0.69,1.36)           | 0.65(0.44,0.95)*        |
| <b>Occupation</b>          |                           |                         |
| Doctor                     | Ref                       | ref                     |
| Nurse                      | 1.18(0.90,1.54)           | 1.38(1.00,1.88)*        |
| Other occupation           | 1.03(0.62,1.70)           | 1.52(0.88,2.63)         |
| <b>Religion</b>            |                           |                         |
| Catholic or none           | Ref                       | ref                     |
| Muslim                     | 3.10(2.10,4.60)***        | 1.00(0.58,1.72)         |
| Orthodox Christian         | 3.18(2.13,4.74) ***       | 1.16(0.68,1.99)         |
| Protestant or other        | 1.98(1.33,2.95) **        | 1.16(0.71,1.89)         |
| <b>Health centre type</b>  |                           |                         |
| Government hospital/clinic | Ref                       | ref                     |
| Private hospital/clinic    | 1.12(0.42,1.51) *         | 0.96(0.70,1.33)         |

|                                                                                                         | <b>Unadjusted<br/>RR (95% CI)</b> | <b>Adjusted<br/>RR (95% CI)</b> |
|---------------------------------------------------------------------------------------------------------|-----------------------------------|---------------------------------|
| Health outpost/CHPS compounds or other                                                                  | 0.58(0.41,0.84) **                | 0.73(0.47,1.13)                 |
| Perceived risk of COVID-19 disease                                                                      |                                   |                                 |
| Low risk                                                                                                | 1.30(0.48,3.53)                   | 0.94(0.33,2.69)                 |
| No risk                                                                                                 | 0.65(0.24,1.75)                   | 0.93(0.33,2.61)                 |
| Very high risk                                                                                          | 0.58(0.21,1.59)                   | 1.08(0.38,3.07)                 |
| High risk                                                                                               | Ref                               | ref                             |
| Effectiveness of COVID-19 vaccine                                                                       |                                   |                                 |
| Very effective                                                                                          | 0.05(0.02,0.12)***                | 0.21(0.08,0.55)*                |
| Somewhat effective                                                                                      | 0.31(0.18,0.53)***                | 0.87(0.46,1.63)                 |
| Not very effective                                                                                      | 0.91(0.52,1.58)                   | 0.97(0.53,1.80)                 |
| Not effective at all                                                                                    | Ref                               | ref                             |
| Workplace policy score (number of policies)                                                             | 0.75(0.68,0.82)***                | 0.98(0.88,1.09)                 |
| Reasons for not vaccinating (number of reasons)                                                         | 2.03(1.90,2.16)***                | 1.78(1.62,1.95)***              |
| Believe the COVID-19 vaccine is a bioweapon                                                             | 2.89(1.99,4.20)***                | 0.94(0.62,1.42)                 |
| Believe vaccines are safe                                                                               | 0.30(0.22,0.40)***                | 0.71(0.50,1.02)                 |
| WHO/UNICEF endorsement of the COVID-19 vaccine as safe and effective affects likelihood get the vaccine |                                   |                                 |
| Much more likely                                                                                        | 0.19(0.13,0.26)***                | 0.51(0.35,0.74)***              |
| More likely                                                                                             | 0.40(0.31,0.52)***                | 0.69(0.52,0.92)*                |
| No difference                                                                                           | Ref                               | ref                             |
| Less likely                                                                                             | 0.50(0.27,0.90)*                  | 0.92(0.47,1.83)                 |
| Much less likely                                                                                        | 0.84(0.31,2.29)                   | 1.53(0.51,4.56)                 |

376 Acronyms: COVID-19; Coronavirus disease 2019, RR: relative risk, CI: Confidence interval, \* <0.05, \*\*<0.01, \*\*\*<0.001

377  
378  
379  
380  
381  
382  
383  
384  
385  
386  
387  
388  
389  
390  
391  
392  
393  
394  
395  
396  
397  
398  
399  
400

## DISCUSSION

We assessed perceptions and predictors of COVID-19 vaccine hesitancy among HCP in Burkina Faso, Ethiopia, Ghana, Nigeria and Tanzania. We found that the majority of HCP had been vaccinated by the time of the survey and that almost a fifth of the HCPs across the sites were hesitant to receive the COVID-19 vaccine. There were differences in vaccine hesitancy by site. The age of a HCP, their profession and perceptions about COVID-19 vaccine effectiveness were significant predictors of vaccine hesitancy in this study. Older HCP reported lower levels of vaccine hesitancy, while nurses and HCP who believed that COVID-19 vaccines were not effective were more likely to be vaccine-hesitant.

Our findings show consistency with some findings from previous studies. In a study of vaccine hesitancy among HCPs in South Africa, being an older HCP or a physician and perceptions of the benefits and risks of vaccination were associated with lower vaccine hesitancy [13]. However, the study also found additional factors that influenced vaccine hesitancy among HCPs including beliefs that vaccines are incompatible with religion and willingness to be vaccinated to protect others [13]. Similarly, another study in Ethiopia found that older age (>40 years) and being a medical doctor were associated with a lower risk of vaccine-hesitancy. In Nigeria, a study found that HCP who were younger, single and with lower income had more vaccine hesitancy, while being a nurse or doctor was associated with lower hesitancy [17]. In Ghana, being female and having a low income have also been associated with increased COVID-19 vaccine hesitancy [18]. These findings suggest there may be information asymmetry for example among different cadres of HCPs and lower perceived risks among some population sub-groups (20). Women additionally face greater concerns about the effects of COVID-19 vaccines on their fertility (21). In this study, we did not observe greater hesitancy among female HCP.

Older age may be associated with lower vaccine hesitancy since age is a risk factor for COVID-19 infection, and that older people are more vulnerable to more severe disease possibly due to more comorbidities. This could be a factor influencing decisions by older HCPs to be vaccinated. In an Africa-wide

401 survey, respondents indicated that vaccine hesitancy was lower among those with a higher perceived risk  
402 of infection [19]. Additionally, HCP who perceive that vaccines are effective may face fewer personal  
403 barriers and may be more willing to take the vaccine. Other factors reported by studies include concerns  
404 about vaccine safety, serious side effects and efficacy of vaccines, with limited information also being a  
405 key factor (16). Additionally, perceptions of lack of COVID-19 vaccine benefits, distrust of the government  
406 and the ability of science to provide safe and effective vaccines and concerns about vaccine safety were  
407 associated with greater vaccine hesitancy [14].

408         The differences between our findings and those from previous studies may be because we  
409 included 5 countries in our study and have a larger sample size and variability of responses than previous  
410 studies. Our findings are able to account for differences in contextual factors across the countries and  
411 determine overall influential factors affecting vaccine hesitancy across countries.

412         In our study, there were differences in vaccine hesitancy among HCP by country, with Burkina  
413 Faso and Tanzania reporting the highest levels of hesitancy and Ghana and Nigeria showing low levels of  
414 hesitancy. Previous studies have also shown variations in acceptance rates from as low as 28% in Central  
415 Africa, and up to 48-49% in West and East Africa (16), suggesting that there may be context-specific  
416 factors influencing attitudes towards COVID-19 vaccines. Country-specific factors such as differences in  
417 availability and access to vaccines, the burden of COVID-19 cases, and variation in mitigation measures  
418 put in place could account for differences across countries. Reported rates of vaccine hesitancy have been  
419 higher in other studies. A study conducted early in the COVID-19 emergency in Nigeria found higher rates  
420 of vaccine hesitancy among HCPs (50%) [17]. In a South African study, 41.0% of HCPs were vaccine-  
421 hesitant [13] and in Ghana, three out of five HCP were hesitant early in the pandemic (22). Levels of  
422 vaccine hesitancy of 41%-45.9% have also been reported among HCP in South Africa and Ethiopia [7].  
423 These studies were conducted early during the COVID-19 pandemic before vaccines had been available.  
424 Additionally, low rates of COVID-19 vaccine acceptance by the general population on the African continent



425 have been reported [20]. Our observations of lower levels of vaccine hesitancy may be partly influenced  
426 by changing attitudes and beliefs towards the COVID-19 vaccine across the continent as the pandemic has  
427 progressed, due to increased cases and mortality, increased information and greater availability of COVID-  
428 19 vaccines.

429 We observed higher levels of COVID-19 vaccination among HCP across our study, compared to  
430 previous reports on the African continent. Two-thirds of HCP interviewed across the 5 countries had  
431 already received the COVID-19 vaccination at the time of the survey; however, vaccination rates were low  
432 in Burkina Faso. Health care providers were prioritized to receive the COVID-19 vaccine initially when the  
433 vaccines were not readily available. It is therefore expected that more HCP had received the vaccine. The  
434 WHO, however, reported that approximately 25% of HCPs were fully vaccinated against COVID-19 on the  
435 African continent by November 2021 [8]. The differences observed between this study and previous  
436 studies could be due to the fact our study is more recent, and vaccines may have been relatively more  
437 available during our study. Additionally, we only assessed vaccination status in a few selected health  
438 centers in the study sites, and our estimates are not nationally representative. Further, four of our survey  
439 sites were in urban areas, where vaccination rates are higher. Reasons for lower vaccination in some of  
440 our study sites could have been due to challenges with the availability of the COVID-19 vaccines, and this  
441 is consistent with the situation across the African continent. Reasons for the limited availability of COVID-  
442 19 vaccines on the African continent have included global architecture and restricted vaccine supply  
443 chains and limited availability of donations promised by donors through the COVAX facility for low- and  
444 middle-income countries by the end of 2021 [21].

445 Another possible reason for the higher vaccination rates and lower vaccine hesitancy we observed  
446 in our study could be because perceptions about the COVID-19 vaccine were mainly positive in our study.  
447 There was a high willingness among the unvaccinated to get vaccinated across three of our five sites.  
448 While some COVID-19 misinformation was reported, the proportion of participants reporting

449 misinformation was low, with few HCPs believing that COVID-19 is a conspiracy or bioweapon; that people  
450 of African descent are immune to COVID-19; that people have died from taking the vaccine; and that the  
451 COVID-19 vaccine was unnecessary. Many in the study correctly believed that the side effects of the  
452 COVID-19 vaccine are usually mild and temporary. The low levels of misinformation overall could have  
453 contributed to lower levels of hesitancy among HCPs.

454         While most of the HCP who had not been vaccinated were willing to take the COVID-19 vaccine,  
455 in Tanzania, willingness to take the COVID-19 vaccination was low. The main reasons for this were  
456 perceptions that the vaccine was not effective, concerns about side effects and the belief that the vaccine  
457 was developed too fast. The concerns about side effects and safety have also been reported in other  
458 studies from similar settings and among the general population (20, 23, 24).

459         Beliefs regarding the safety and effectiveness of the COVID-19 vaccine are important  
460 considerations for HCP uptake. The majority of HCP in this study believed that COVID-19 vaccines are safe  
461 and effective in preventing the disease. In this study, HCP rightly perceived a high risk of exposure to  
462 COVID-19 across all countries, an observation likely due to HCP attending to patients which puts them at  
463 a higher risk of exposure to the disease. In contrast, most of the HCP believed that there is insufficient  
464 evidence that the COVID-19 vaccine prevents the occurrence and spread of COVID-19. This observation  
465 could reflect sentiments that although Europe, America and Asia had greater availability of vaccines, their  
466 reported declines in morbidity lagged as vaccine rollout continued in these contexts. Finally, there were  
467 concerns about how quickly the vaccine had been developed in this study since drug development usually  
468 takes many years to go through the various pre-clinical and clinical stages. In addition, at least a quarter  
469 of respondents indicated that the origin of the vaccine influenced their willingness to take COVID-19  
470 vaccines, and a similar proportion indicated that if a vaccine were developed and tested in Africa, this  
471 would increase their willingness to take it. Potential concerns about vaccine safety and efficacy may be  
472 partially addressed in the future by encouraging local production of vaccines on the African continent.

473           Our study had limitations. Being a telephone survey, it would not have been equally available to  
474 all health workers, and it was affected by non-response in some countries. We instituted replacements  
475 using randomly allocated individuals from existing sampling frames and HCP lists to mitigate against this.  
476 Additionally, 4 of our 5 study sites were urban, and therefore findings may not be attributable to HCPs in  
477 rural areas.

478           In conclusion, in this study, we found low COVID-19 vaccine hesitancy across most countries, with  
479 higher vaccine hesitancy among HCP in Burkina Faso and Tanzania. We also found that factors associated  
480 with hesitancy include age, occupation, beliefs about vaccine effectiveness and endorsement by global  
481 public health institutions. Efforts to increase vaccine uptake will have to address vaccine hesitancy by  
482 tackling information and knowledge gaps among different cadres of health workers, along with efforts to  
483 increase vaccine supply.

484

485

486

487

488

489

490

491

492

493

494

495

496

497 **Acknowledgments**

498           We thank all study participants and data collectors for contributing to this study. The survey team  
499 in Ghana appreciates support from the Kintampo Health Research Centre of Ghana Health Service, and  
500 community leadership of Kintampo North Municipality and Kintampo South District. We acknowledge  
501 institutional support from Harvard T.H. Chan School of Public Health, Boston, MA; Harvard University  
502 Center for African Studies, Boston, MA; Heidelberg Institute of Global Health, Germany and the George  
503 Washington University Milken Institute of Public Health, Washington, DC who provided support for the  
504 work.

505

506 **Authors' contributions**

507 IM and LNA conceived and designed the study, analyzed the data, and drafted the manuscript. WWF  
508 was the principal investigator for the parent study, conceived the study, designed the study, interpreted  
509 the data, and guided revisions of the manuscript. EP, TA, VB, CJ, DW, FM, OM, NA,AC, FW, BL, ECH, AI,  
510 SA, KPA,YB, JK, AO, AS, AS, SV, MMS, SV, ES, TB and RT designed the study, interpreted the data and  
511 revised the manuscript. All authors read and approved the final manuscript.

512

513

## 514 References

- 515 1. WHO. COVID-19 situation reports. [https://www.who.int/emergencies/diseases/novel-](https://www.who.int/emergencies/diseases/novel-coronavirus-2019/situation-reports)  
516 [coronavirus-2019/situation-reports](https://www.who.int/emergencies/diseases/novel-coronavirus-2019/situation-reports). 2022.
- 517 2. Mutombo PN, Fallah MP, Munodawafa D, Kabel A, Houeto D, Goronga T, et al. COVID-19 vaccine  
518 hesitancy in Africa: a call to action. *Lancet Glob Health*. 2022;10(3):e320-e1.
- 519 3. Asundi A, O'Leary C, Bhadelia N. Global COVID-19 vaccine inequity: The scope, the impact, and  
520 the challenges. *Cell Host Microbe*. 2021;29(7):1036-9.
- 521 4. The Lancet Infectious D. Time for Africa to future-proof, starting with COVID-19. *Lancet Infect*  
522 *Dis*. 2022;22(2):151-.
- 523 5. <https://africacdc.org/covid-19-vaccination/>. Accessed: 22 September, 2022.
- 524 6. [https://ourworldindata.org/covid-vaccinations#what-share-of-the-population-has-received-at-](https://ourworldindata.org/covid-vaccinations#what-share-of-the-population-has-received-at-least-one-dose-of-the-covid-19-vaccine)  
525 [least-one-dose-of-the-covid-19-vaccine](https://ourworldindata.org/covid-vaccinations#what-share-of-the-population-has-received-at-least-one-dose-of-the-covid-19-vaccine).
- 526 7. Madzorera I, Ismail A, Hemler EC, Korte ML, Olufemi AA, Wang D, et al. Impact of COVID-19 on  
527 Nutrition, Food Security, and Dietary Diversity and Quality in Burkina Faso, Ethiopia and Nigeria. *The*  
528 *American Journal of Tropical Medicine and Hygiene*. 2021;105(2):295-309.
- 529 8. Taylor-Robinson SD, Morgan MY, Spearman CW, Suliman AAA, Corrah T, Oleribe OO, et al. Why  
530 SARS-CoV-2 vaccination still matters in Africa. *QJM: An International Journal of Medicine*.  
531 2022;115(3):191-2.
- 532 9. Aemro A, Amare NS, Shetie B, Chekol B, Wassie M. Determinants of COVID-19 vaccine hesitancy  
533 among health care workers in Amhara region referral hospitals, Northwest Ethiopia: a cross-sectional  
534 study. *Epidemiol Infect*. 2021;149:e225.
- 535 10. WHO. [https://www.afro.who.int/news/only-1-4-african-health-workers-fully-vaccinated-](https://www.afro.who.int/news/only-1-4-african-health-workers-fully-vaccinated-against-covid-19)  
536 [against-covid-19](https://www.afro.who.int/news/only-1-4-african-health-workers-fully-vaccinated-against-covid-19).
- 537 11. Machingaidze S, Wiysonge CS. Understanding COVID-19 vaccine hesitancy. *Nature Medicine*.  
538 2021;27(8):1338-9.
- 539 12. MacDonald NE. Vaccine hesitancy: Definition, scope and determinants. *Vaccine*.  
540 2015;33(34):4161-4.
- 541 13. CDC. A. COVID-19 Vaccine Perceptions: A 15-country study, February 2021  
542 <https://africacdc.org/download/COVID-19-vaccine-perceptions-a-15-country-study/> [Accessed 10 March  
543 2022] 2021.
- 544 14. Wiysonge CS, Alobwede SM, de Marie CKP, Kidzeru EB, Lumngwena EN, Cooper S, et al. COVID-  
545 19 vaccine acceptance and hesitancy among healthcare workers in South Africa. *Expert Rev Vaccines*.  
546 2022:1-11.
- 547 15. Mohammed R, Nguse TM, Habte BM, Fentie AM, Gebretekle GB. COVID-19 vaccine hesitancy  
548 among Ethiopian healthcare workers. *PLoS One*. 2021;16(12):e0261125.
- 549 16. Ackah M, Ameyaw L, Gazali Salifu M, Afi Asubonteng DP, Osei Yeboah C, Narkotey Annor E, et al.  
550 COVID-19 vaccine acceptance among health care workers in Africa: A systematic review and meta-  
551 analysis. *PLOS ONE*. 2022;17(5):e0268711.
- 552 17. Yendewa SA, Ghazzawi M, James PB, Smith M, Massaquoi SP, Babawo LS, et al. COVID-19  
553 Vaccine Hesitancy among Healthcare Workers and Trainees in Freetown, Sierra Leone: A Cross-Sectional  
554 Study. *Vaccines (Basel)*. 2022;10(5).
- 555 18. Darling AM, Assefa N, Bärnighausen T, Berhane Y, Canavan CR, Guwatudde D, et al. Design and  
556 field methods of the ARISE Network Adolescent Health Study. *Tropical Medicine & International Health*.  
557 2020;25(1):5-14.
- 558 19. Hemler E KM, Lankoande B, Ourohire M, Assefa N, Chukwu A, Workneh F, Tinkasimile A, Lyatuu  
559 I, Soura A, Wang D, Madzorera I, Vuai S, Baernighausen T, Mwanyika Sando M, Killewo J, Oduola A, Sie

- 560 A, Berhane Y, Fawzi WW. Design and Field Methods of the ARISE Network COVID-19 Rapid Monitoring  
561 Survey. . The American Journal of Tropical Medicine and Hygiene 2020.  
562 20. Pertwee E, Simas C, Larson HJ. An epidemic of uncertainty: rumors, conspiracy theories and  
563 vaccine hesitancy. Nature Medicine. 2022;28(3):456-9.  
564 21. Prasad S, Kalafat E, Blakeway H, Townsend R, O'Brien P, Morris E, et al. Systematic review and  
565 meta-analysis of the effectiveness and perinatal outcomes of COVID-19 vaccination in pregnancy. Nature  
566 Communications. 2022;13(1):2414.  
567 22. Agyekum MW, Afrifa-Anane GF, Kyei-Arthur F, Addo B. Acceptability of COVID-19 vaccination  
568 among health care workers in Ghana. medRxiv. 2021:2021.03.11.21253374.  
569 23. Cooper S, van Rooyen H, Wiysonge CS. COVID-19 vaccine hesitancy in South Africa: how can we  
570 maximize uptake of COVID-19 vaccines? Expert Review of Vaccines. 2021;20(8):921-33.  
571 24. Carcelen AC, Prosperi C, Mutembo S, Chongwe G, Mwansa FD, Ndubani P, et al. COVID-19  
572 vaccine hesitancy in Zambia: a glimpse at the possible challenges ahead for COVID-19 vaccination rollout  
573 in sub-Saharan Africa. Hum Vaccin Immunother. 2022;18(1):1-6.

574

575

medRxiv preprint doi: <https://doi.org/10.1101/2022.10.11.22280952>; this version posted October 11, 2022. The copyright holder for this preprint (which was not certified by peer review) is the author/funder, who has granted medRxiv a license to display the preprint in perpetuity. It is made available under a [CC-BY 4.0 International license](#).

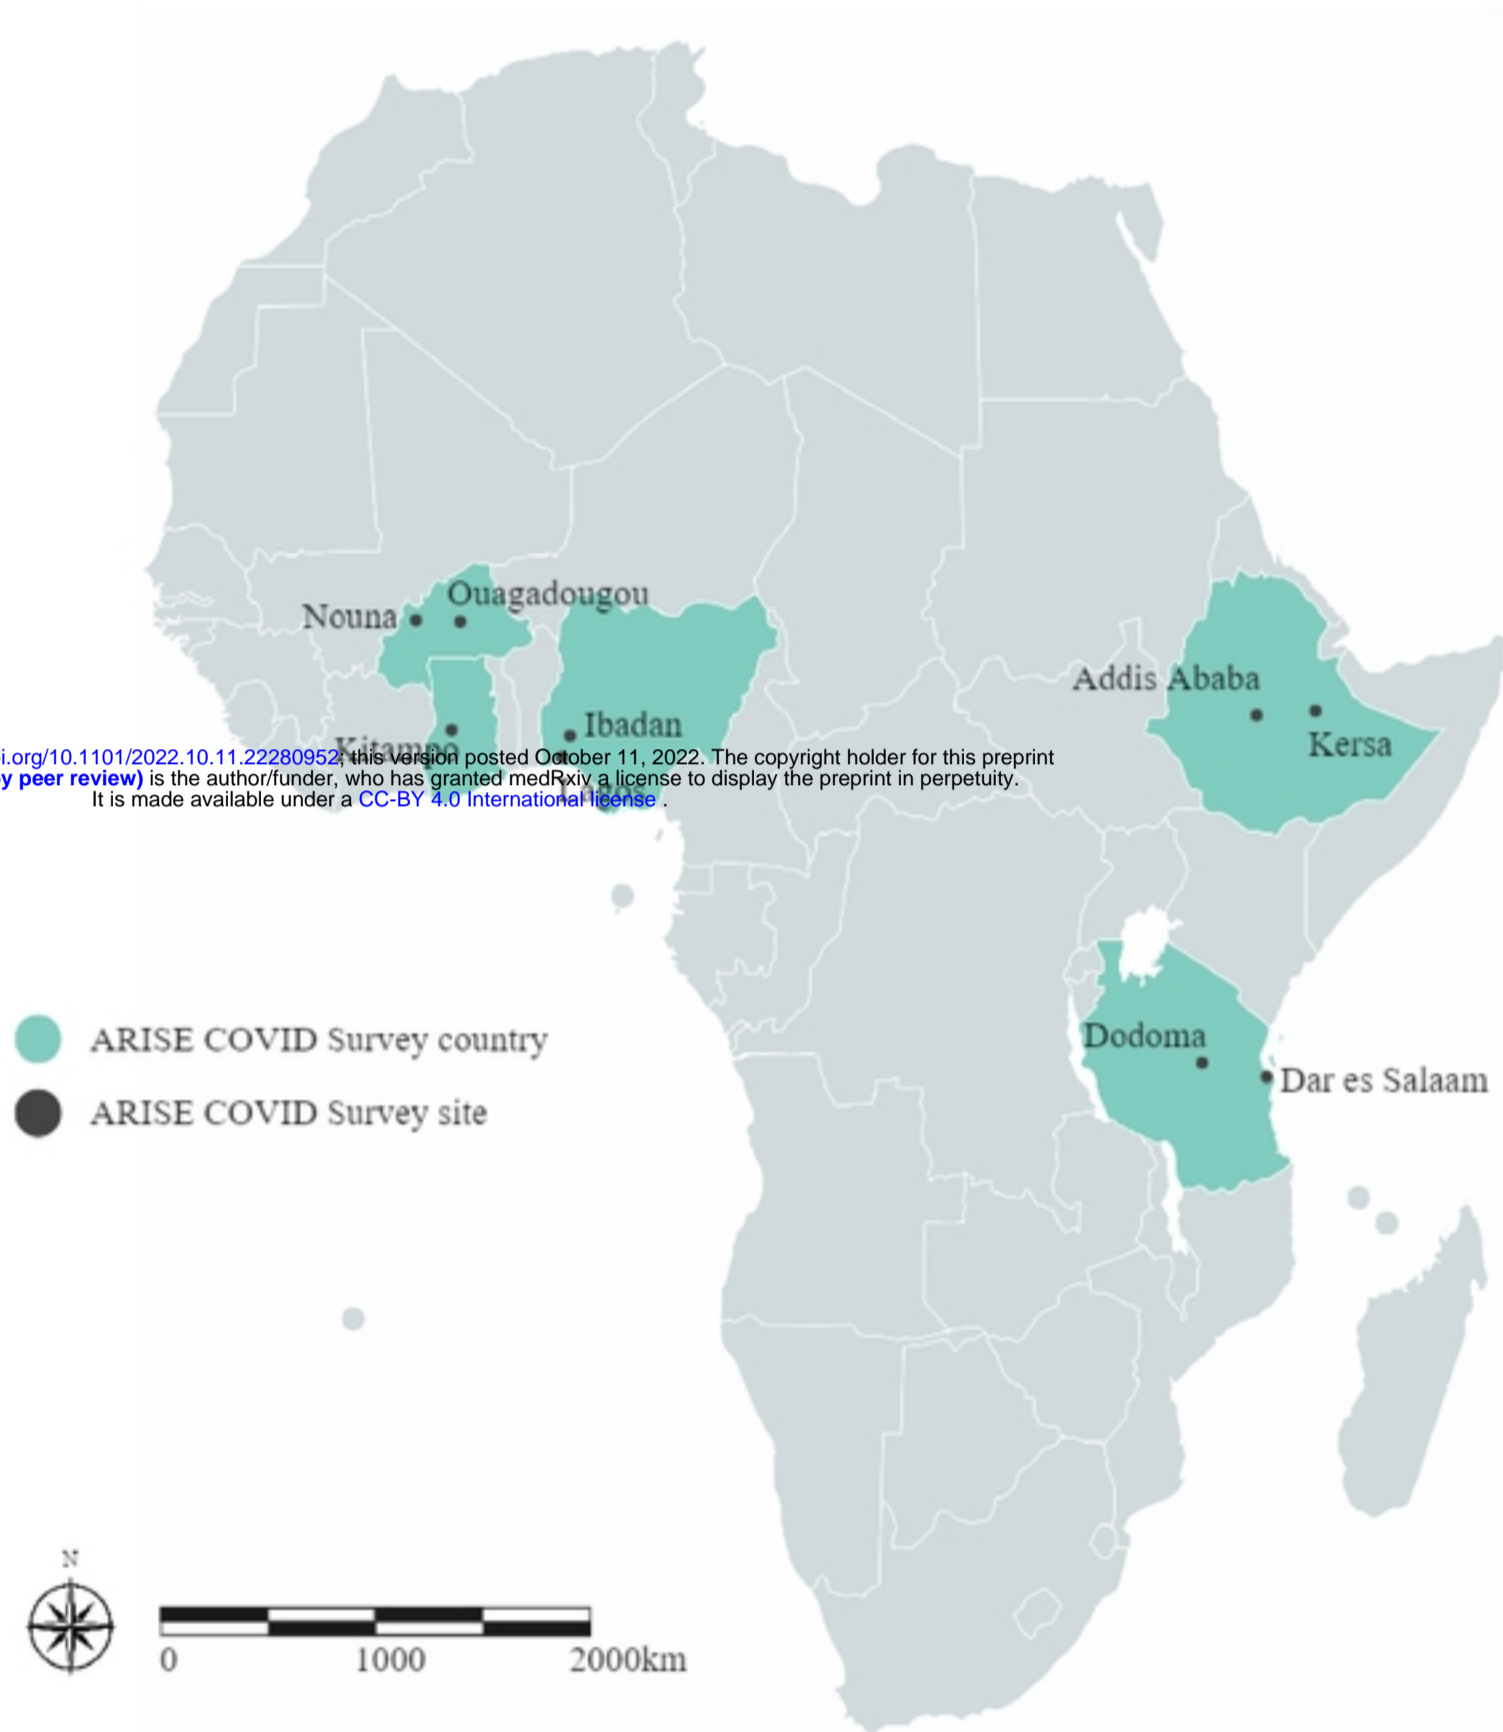

**Figure 1. Map of study sites included in the ARISE COVID-19 Round 2 Survey, 2021**

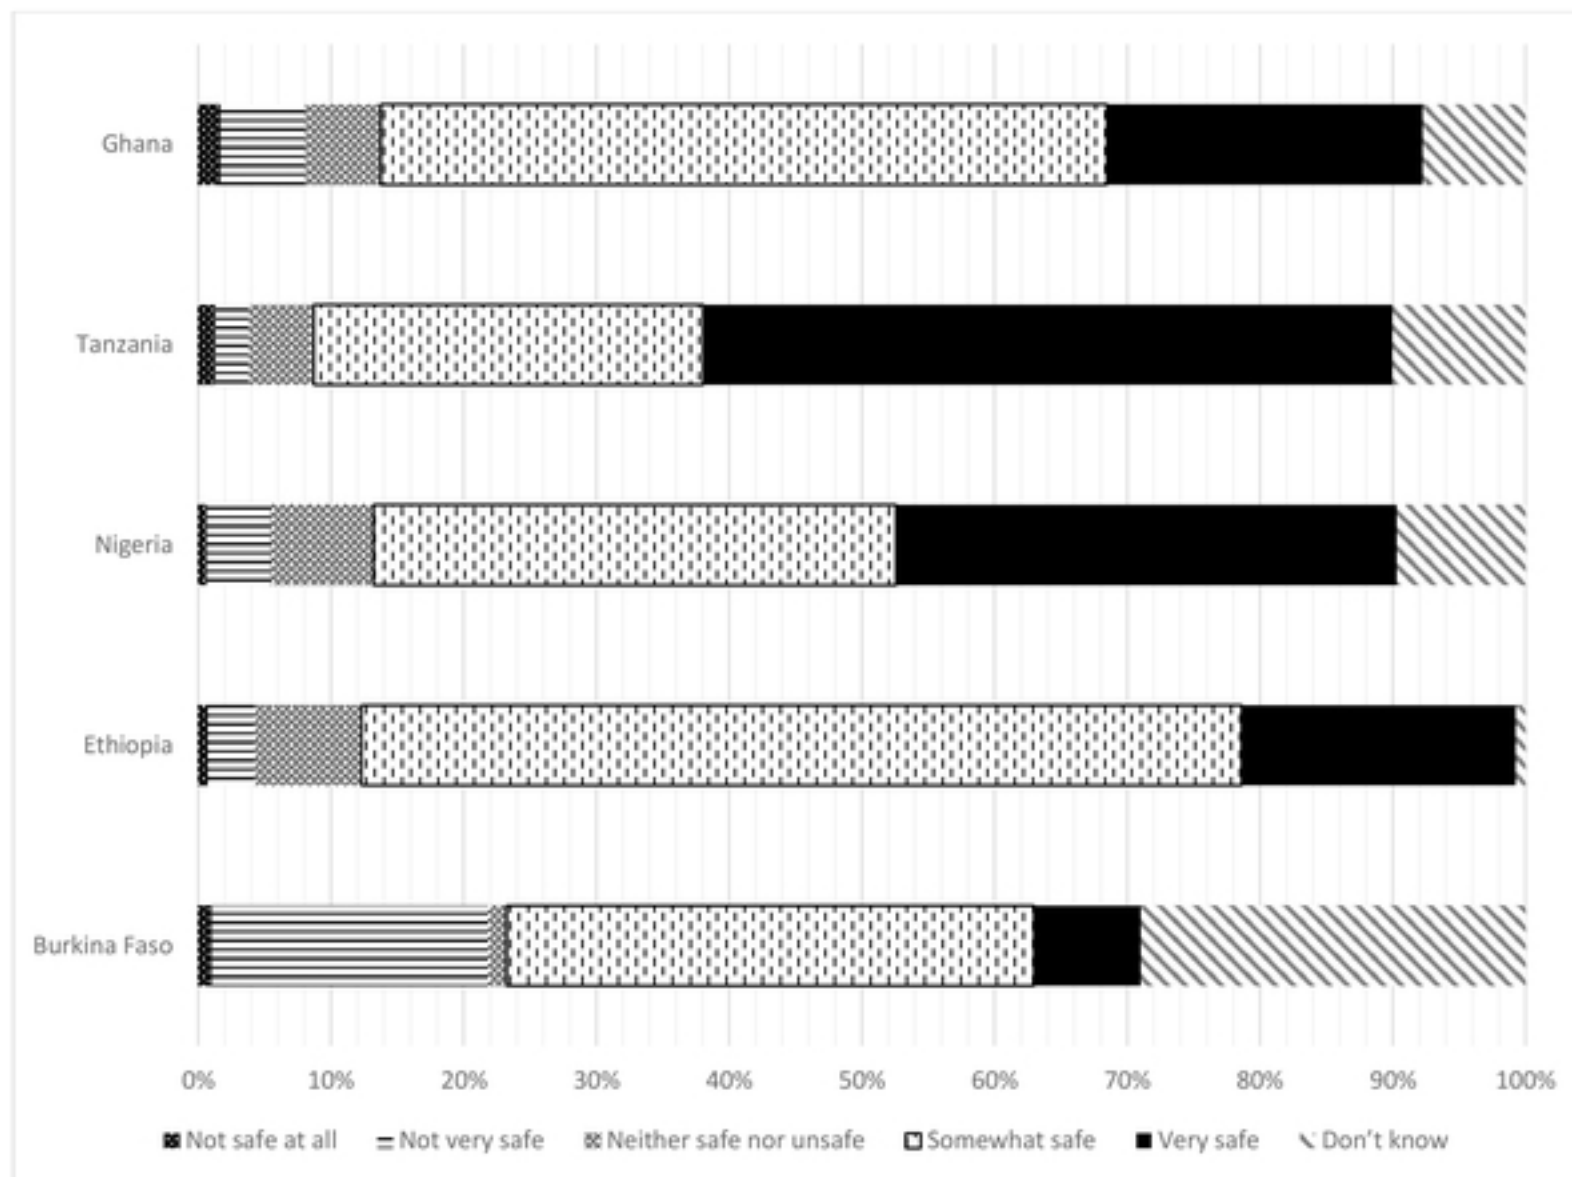

Figure 2b: Health care provider perceptions on COVID-19 vaccine safety in 5 countries in sub-Saharan Africa

Figure2b



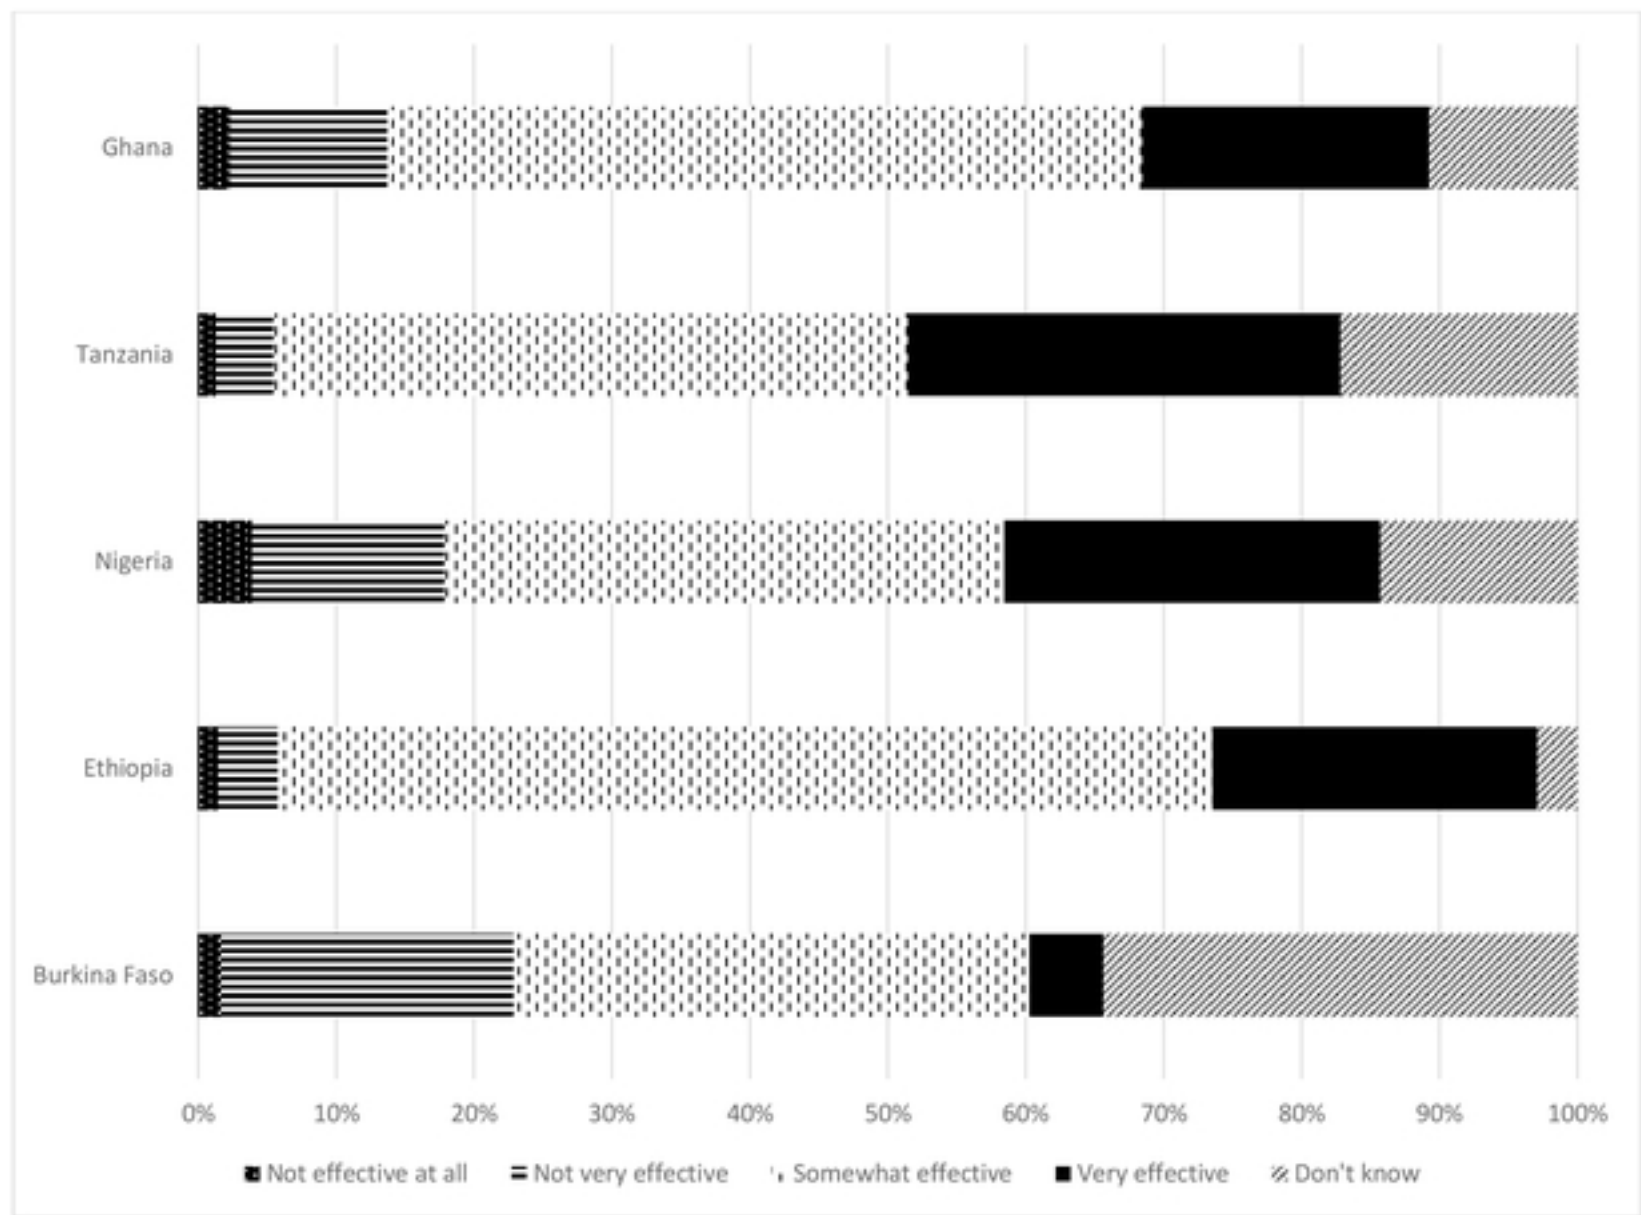

Figure 2c: Health care provider perceptions on COVID-19 vaccine effectiveness in 5 countries in sub-Saharan Africa

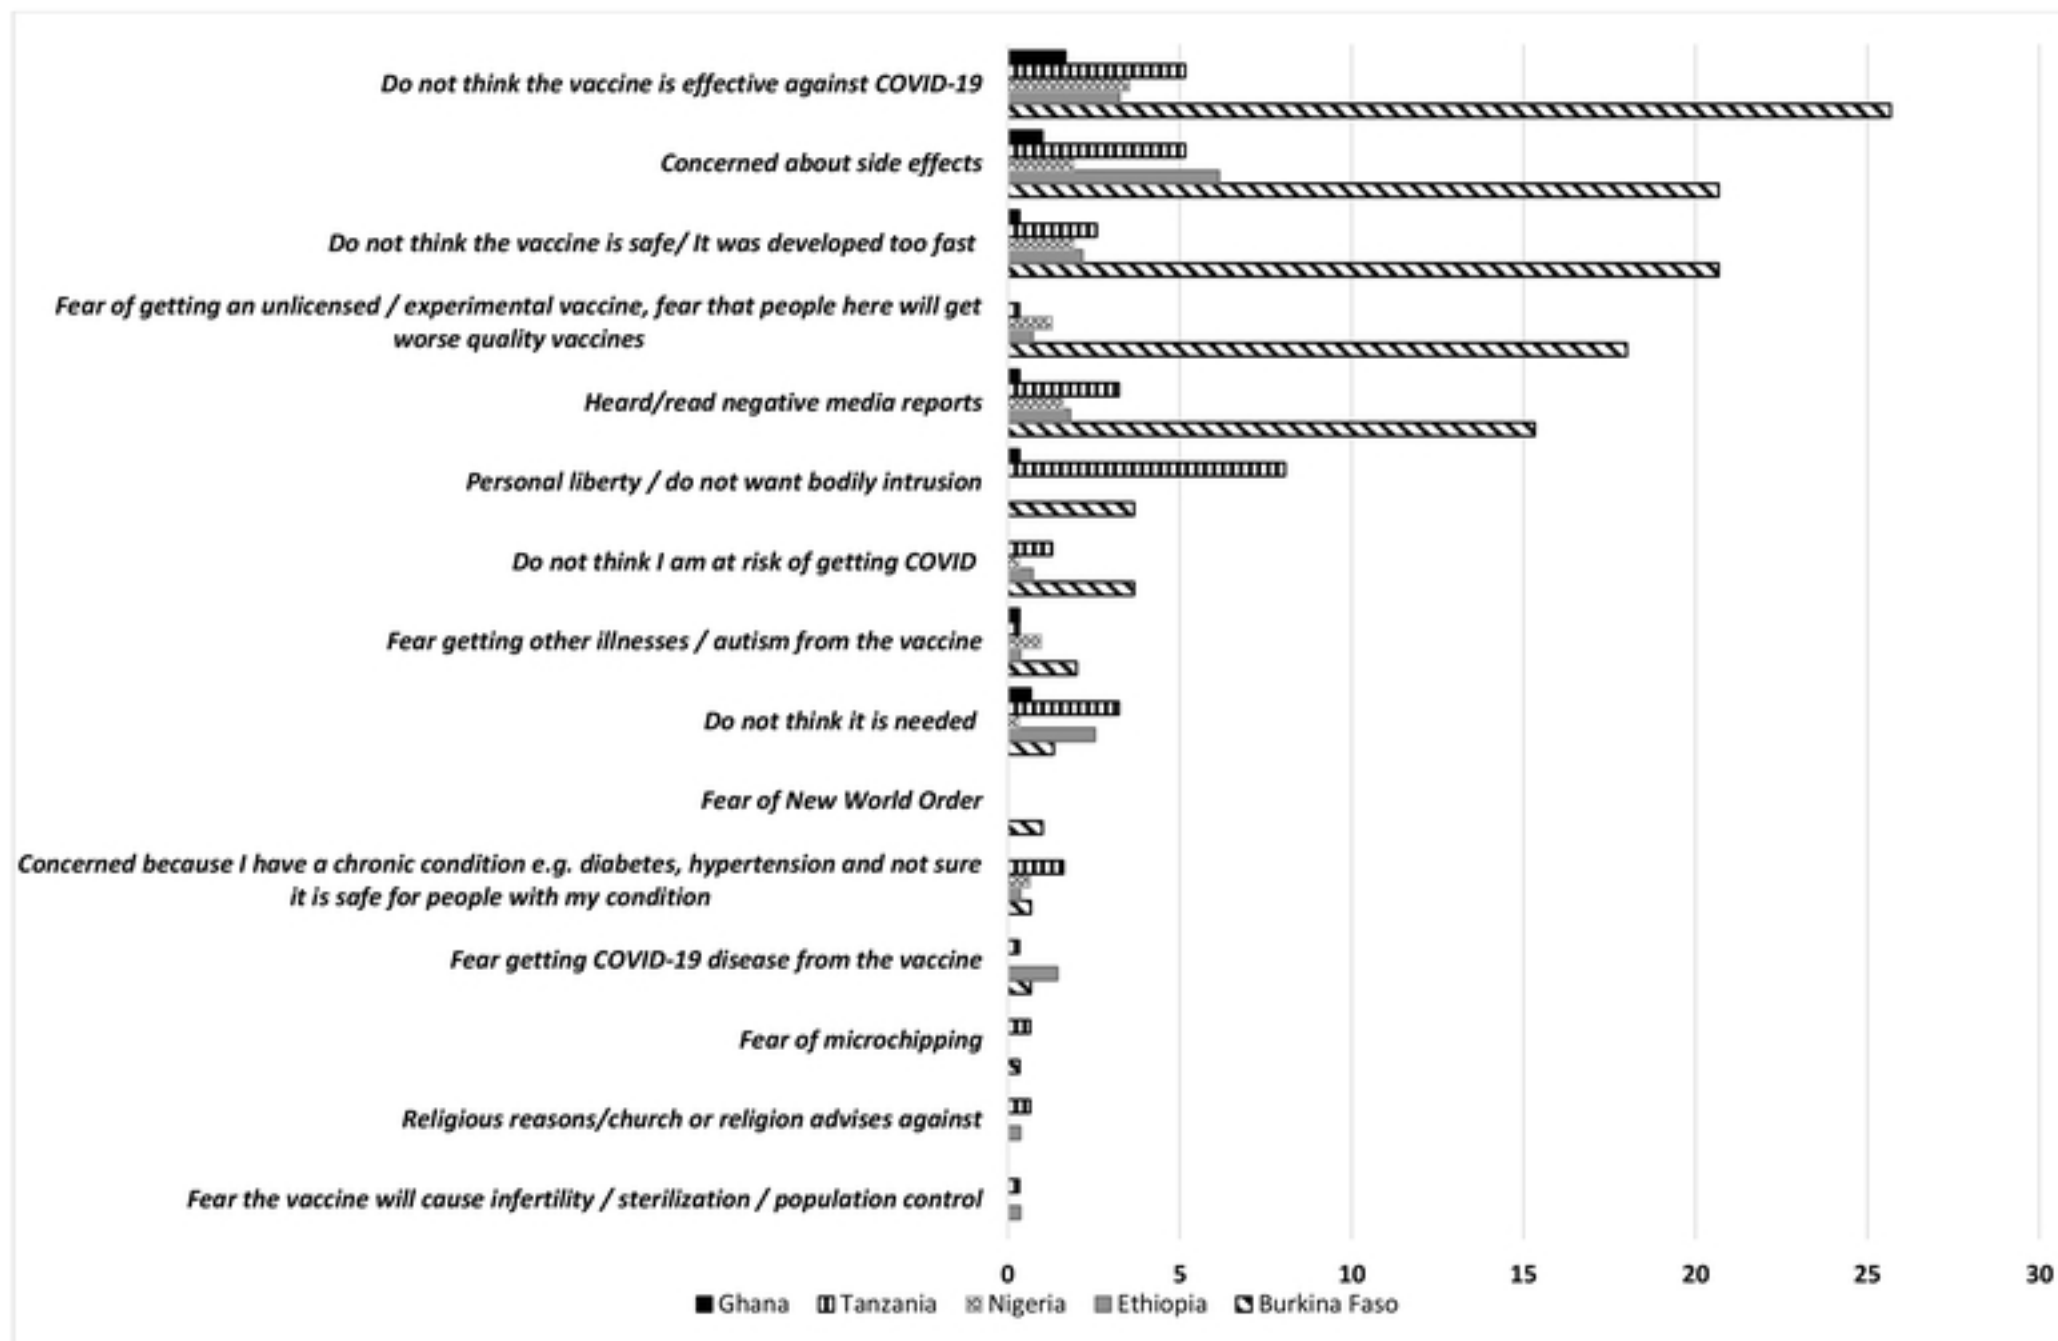

Figure 3: Frequent reasons (%) for not getting COVID-19 vaccination in 5 countries in sub-Saharan Africa

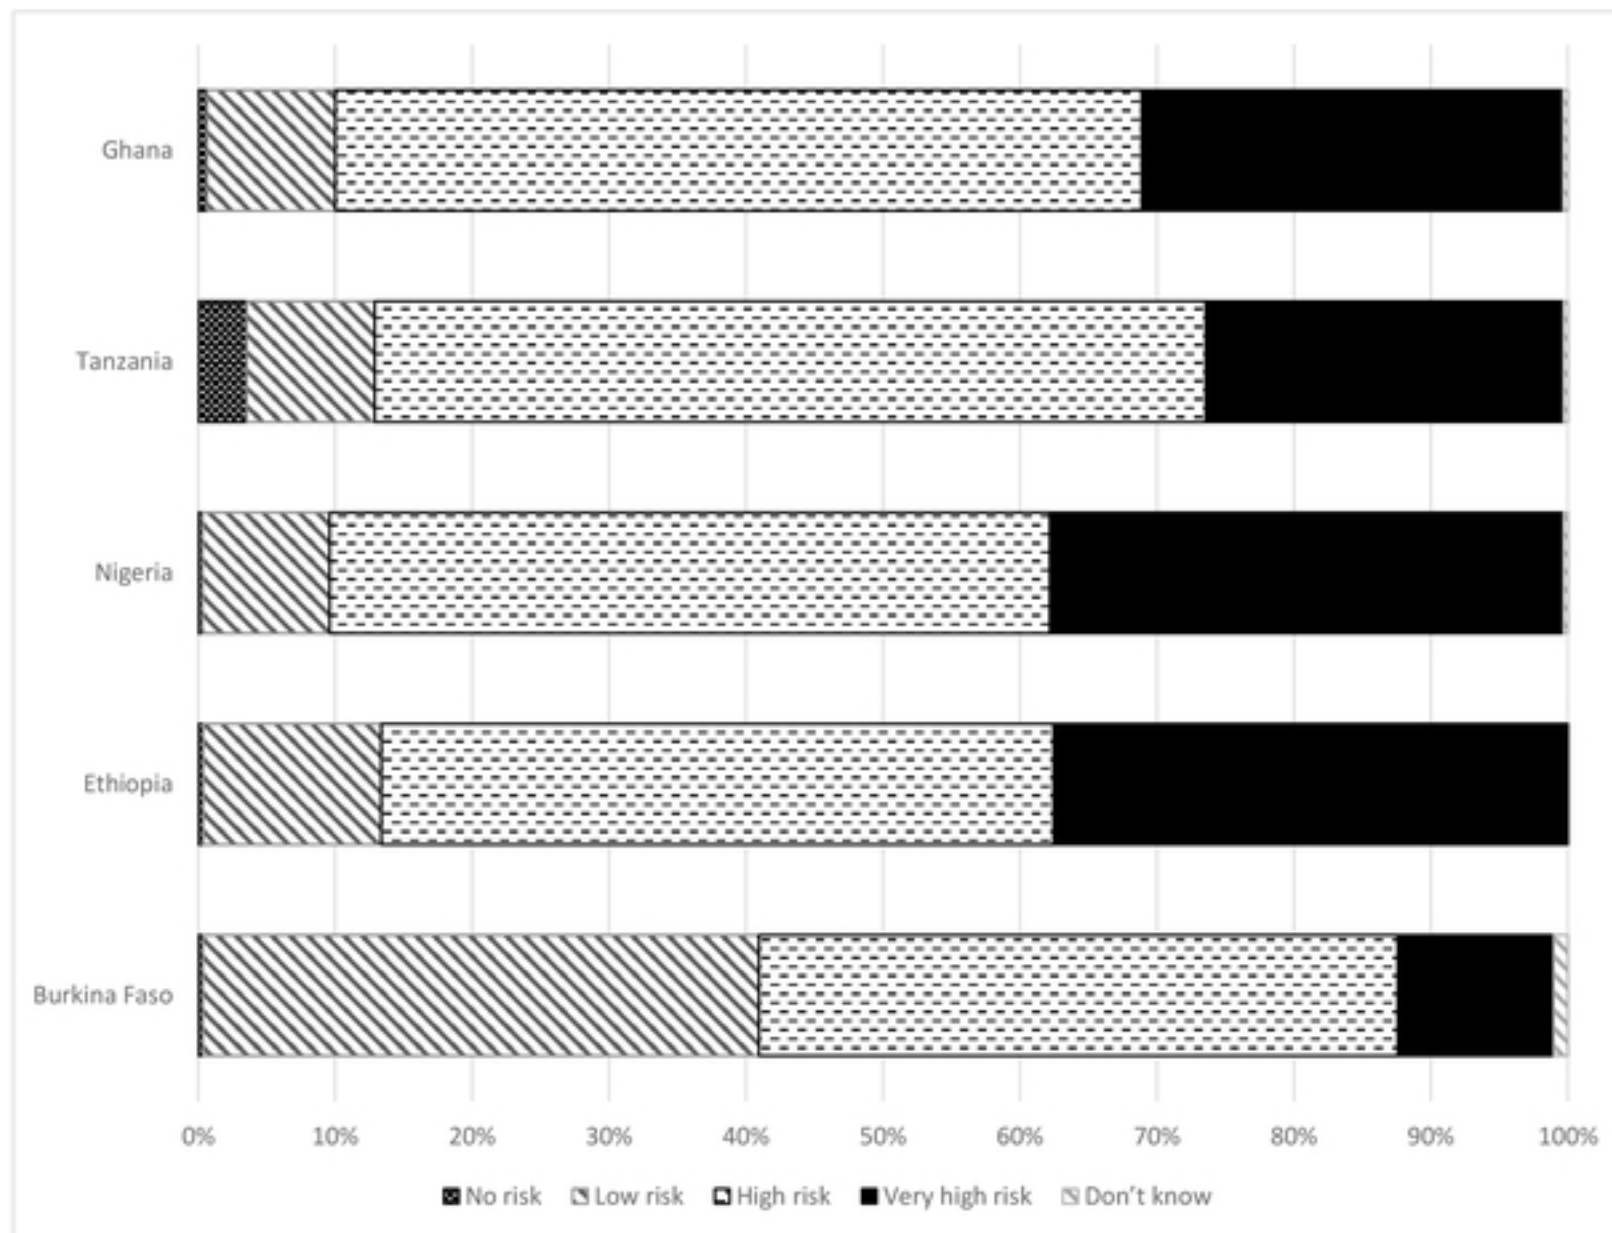

Figure 2a: Health care provider perceptions of risk of COVID-19 exposure in 5 countries in sub-Saharan Africa

Figure2a
